# Supplementary material for: Biodiversity of Basidiomycetous Yeasts Associated with Cladonia rei Lichen in Japan, with a Description of Microsporomyces cladoniophilus sp. nov
Source: MDPI journal article supplement (doi:10.3390/jof9040473), 2023-04-14
Supplement: s1 [file s1]

Table S1. List of sequences retrieved from GenBank used for phylogenetic analyses. “TYPE” indicates the holotype strain.

| Taxon                                    | Strain/voucher                       | ITS       | LSU       |
|------------------------------------------|--------------------------------------|-----------|-----------|
| <i>Bannoa bischofia</i>                  | JCM 10338 (TYPE)                     | AB035721  | AB082572  |
| <i>Bannoa hahjimensis</i>                | JCM 10336 (TYPE)                     | AB035897  | AB082571  |
| <i>Bannoa ogasawarensis</i>              | JCM 10326 (TYPE)                     | AB035713  | AB082570  |
| <i>Bannoa syzygii</i>                    | JCM 10337 (TYPE)                     | AB035720  | AB082573  |
| <i>Buckleyzyma armeniaca</i>             | CBS 8076 (TYPE)                      | AF444523  | AF189920  |
| <i>Buckleyzyma aurantiaca</i>            | CBS 371 (TYPE)                       | AF444538  | AF189921  |
| <i>Buckleyzyma kluyveri-nielii</i>       | CBS 7168 (TYPE)                      | AF444544  | AF189988  |
| <i>Buckleyzyma phyllomatis</i>           | CBS 7198 (TYPE)                      | AF444515  | AF189991  |
| <i>Buckleyzyma salicina</i>              | CBS 6983 (TYPE)                      | AF444511  | AF189995  |
| <i>Cyphobasidium hypogymniicola</i>      | S-F264671                            | KU587700  | KU587694  |
| <i>Cyphobasidium usneicola</i>           | S-F264675                            | KU587704  | KU587699  |
| <i>Cyrenella elegans</i>                 | CBS 274.82 (TYPE)                    | KJ778626  | KJ708454  |
| <i>Cystobasidium benthicum</i>           | JCM 10901 (TYPE)                     | AB026001  | AB026001  |
| <i>Cystobasidium calyptogenae</i>        | JCM 10899 (TYPE)                     | AB025996  | AB025996  |
| <i>Cystobasidium fimentarium</i>         | DB1489                               | -         | AY512843  |
| <i>Cystobasidium laryngis</i>            | JCM 10953 (TYPE)                     | AB078500  | AB078500  |
| <i>Cystobasidium lysinophilum</i>        | JCM 5951 (TYPE)                      | AB078501  | AB078501  |
| <i>Cystobasidium minutum</i>             | CBS 319 (TYPE)                       | AF190011  | AF189945  |
| <i>Cystobasidium oligophagum</i>         | KM1106 (TYPE)                        | AB702968  | AB702967  |
| <i>Cystobasidium pallidum</i>            | JCM 3780 (TYPE)                      | AB078492  | AF189962  |
| <i>Cystobasidium pinicola</i>            | AS 2.2193 (TYPE)                     | AF444292  | AF444293  |
| <i>Cystobasidium portillonenses</i>      | 071209-Pi 2-frotapiedra-7-lev (TYPE) | JQ769323  | JQ769312  |
| <i>Cystobasidium psychroaquaticum</i>    | CBS 11769 (TYPE)                     | KY103148  | KY107444  |
| <i>Cystobasidium ritchiei</i>            | CBS 12324 (TYPE)                     | KY103149  | KY107445  |
| <i>Cystobasidium slooffiae</i>           | JCM 10954 (TYPE)                     | AF444627  | AF444722  |
| <i>Erythrobasidium elongatum</i>         | CBS8080 (TYPE)                       | AF444561  | AF189983  |
| <i>Erythrobasidium hasegawianum</i>      | AS 2.1923 (TYPE)                     | AF444522  | AF189899  |
| <i>Erythrobasidium yunnanensis</i>       | AS 2.209 (TYPE)                      | AB030353  | AY335162  |
| <i>Hasegawazyma lactosa</i>              | CBS 5826 (TYPE)                      | NR 073295 | NG 057668 |
| <i>Microsporomyces bloemfonteinensis</i> | CBS 8598 (TYPE)                      | EU075189  | EU075187  |
| <i>Microsporomyces hainanensis</i>       | CICC 33066 (TYPE)                    | KU296948  | KU296947  |
| <i>Microsporomyces magnisporus</i>       | JCM 11898 (TYPE)                     | AB112078  | AB111954  |
| <i>Microsporomyces orientis</i>          | CBS 8594 (TYPE)                      | HM559719  | HM559718  |
| <i>Microsporomyces pini</i>              | CBS 107345 (TYPE)                    | EU075190  | EU075188  |
| <i>Naohidea sebacea</i>                  | CBS 8477 (TYPE)                      | DQ911616  | DQ831020  |
| <i>Occultifur brasiliensis</i>           | UFMG-CM-Y376                         | KM248526  | KM248525  |
| <i>Occultifur externus</i>               | JCM 10725 (TYPE)                     | AF444567  | AF189910  |

|                                         |                     |           |           |
|-----------------------------------------|---------------------|-----------|-----------|
| <i>Occultifur kilbournensis</i>         | NRRL Y-63695 (TYPE) | NR 155564 | KP413160  |
| <i>Occultifur tropicalis</i>            | DMKU SE59 (TYPE)    | NR 148062 | -         |
| <i>Occultifur mephitis</i>              | EXF-6473            | KX929057  | -         |
| <i>Sakaguchia cladiensis</i>            | CBS 10878 (TYPE)    | FJ008055  | FJ008049  |
| <i>Sakaguchia dacryoidea</i>            | JCM 3795 (TYPE)     | AF444597  | AF189972  |
| <i>Sakaguchia lamellibrachii</i>        | CBS 9598 (TYPE)     | AB025999  | AB025999  |
| <i>Sakaguchia meli</i>                  | CBS 10797 (TYPE)    | FJ807683  | KJ708452  |
| <i>Sakaguchia oryzae</i>                | AS2.2363 (TYPE)     | AY335160  | AY335161  |
| <i>Symmetrospora coprosmae</i>          | JCM 8772 (TYPE)     | AF444577  | AF189980  |
| <i>Symmetrospora foliicola</i>          | AS 2.2527 (TYPE)    | AF444521  | AF189984  |
| <i>Symmetrospora gracilis</i>           | JCM 2963 (TYPE)     | AF444578  | AF189985  |
| <i>Symmetrospora marina</i>             | JCM 3776 (TYPE)     | AF444504  | AF189944  |
| <i>Symmetrospora symmetrica</i>         | AS 2.2299 (TYPE)    | AY364836  | AY364836  |
| <i>Symmetrospora vermiculatus</i>       | JCM 10224 (TYPE)    | AB030335  | AF460176  |
| <i>Symmetrospora oryzicola</i>          | JCM 5299 (TYPE)     | AF444546  | AF189990  |
| <i>Microsporomyces pisutiana</i>        | SNI4A CKV1          | MK491197  | MK491270  |
| <i>Microsporomyces pisutiana</i>        | CSA5A CKV1          | MK491194  | MK491265  |
| <i>Microsporomyces pisutiana</i>        | Pol14e3 CKV         | MK491198  | MK491269  |
| <i>Microsporomyces pisutiana</i>        | LNV4A CKV1          | MK491196  | MK491266  |
| <i>Robertozyma ningxiaensis</i>         | CGMCC2.4451 (TYPE)  | MK050392  | -         |
| <i>Begerowomyces foliicola</i>          | CGMCC2.3164 (TYPE)  | MK050394  | -         |
| <i>Halobasidium xiangyangense</i>       | HBUAS51001 (TYPE)   | MH209248  | -         |
| <i>Queiroziella brasiliensis</i>        | BI02                | MH244424  | -         |
| <i>Cystobasidiopsis lophatheri</i>      | CBS 11272 (TYPE)    | NR 144767 | -         |
| <i>Cystobasidiopsis lactophilus</i>     | CBS 7725 (TYPE)     | KY103120  | KY107426  |
| <i>Cystobasidiopsis nirenbergiae</i>    | TUB F580 (TYPE)     | NR 158377 | -         |
| <i>Ballistosporomyces sasicola</i>      | CBS 7285 (TYPE)     | NR 077095 | NG 058696 |
| <i>Ballistosporomyces bomiensis</i>     | XZ33D1              | JN620355  | JN620355  |
| <i>Ballistosporomyces changbaiensis</i> | CB266 (TYPE)        | KP020105  | KP020105  |
| <i>Kurtzmanomyces insolitus</i>         | CBS 8377            | KY103926  | KY108194  |
| <i>Septobasidium carestianum</i>        | DJM644              | DQ241448  | DQ241481  |
| <i>Septobasidium velutinum</i>          | DAH(024)            | DQ241467  | DQ242500  |
| <i>Septobasidium wilsonianum</i>        | DAH 037             | DQ241469  | DQ241502  |
| <i>Septobasidium taxodii</i>            | DAH 194c            | DQ241466  | DQ241499  |
| <i>Septobasidium pallidum</i>           | CLZhao 757          | MG231816  |           |
| <i>Septobasidium septobasidioides</i>   | DAH 032             | DQ241461  | DQ241494  |
| <i>Septobasidium gomezii</i>            | DAH 031             | DQ241462  | DQ241495  |
| <i>Septobasidium mariani</i>            | DAH 283b            | DQ241456  | DQ241489  |
| <i>Septobasidium pseudopedicellatum</i> | DAH 044             | DQ241460  | DQ241493  |
| <i>Septobasidium sinuosum</i>           | DAH 036             | DQ241464  | DQ241497  |
| <i>Septobasidium alni</i>               | DAH FP3             | DQ241441  | DQ241474  |

|                                   |             |          |          |
|-----------------------------------|-------------|----------|----------|
| <i>Septobasidium apiculatum</i>   | DAH 064     | DQ241442 | DQ241475 |
| <i>Septobasidium arachnoideum</i> | DAH 025     | DQ241443 | DQ241476 |
| <i>Septobasidium burtii</i>       | DAH 062     | DQ241444 | DQ241477 |
| <i>Septobasidium cavarae</i>      | DAH FP1     | DQ241445 | DQ241478 |
| <i>Septobasidium canescens</i>    | DAH 323     | DQ241446 | DQ241479 |
| <i>Septobasidium cokeri</i>       | DAH 061     | DQ241449 | DQ241482 |
| <i>Septobasidium ramorum</i>      | DAH 045a    | DQ241450 | DQ241483 |
| <i>Septobasidium fumigatum</i>    | DAH 005     | DQ241451 | DQ241484 |
| <i>Septobasidium grandisporum</i> | DAH 065     | DQ241453 | DQ241486 |
| <i>Septobasidium griseum</i>      | DAH 008     | DQ241455 | DQ241488 |
| <i>Septobasidium michelianum</i>  | DAH FP5     | DQ241457 | DQ241490 |
| <i>Septobasidium pinicola</i>     | DAH 013     | DQ241459 | DQ241492 |
| <i>Septobasidium pilosum</i>      | DAH 020     | DQ241458 | DQ241491 |
| <i>Septobasidium meredithiae</i>  | DAH 257     | DQ241465 | DQ241498 |
| <i>Septobasidium westoni</i>      | DAH FP2001  | DQ241468 | DQ241501 |
| <i>Uredinella coccidiophaga</i>   | DAH 217c    | DQ241471 | DQ241504 |
| <i>Boekhoutia sterigmata</i>      | CGMCC2.4539 | MK050371 | MK050371 |
| <i>Pachnocybe ferruginea</i>      | DAH pfl     | DQ241473 | -        |

---

Table S2. The OTUs list with taxonomic identification and their read counts in each sample.

| OTU ID | Phylum        | Class               | Order             | Family               | Genus           | Species                      | Sample 9 | Sample 10 | Sample 11 | Sample 12 | Sample 13 | Sample 14 | Sample 15 |
|--------|---------------|---------------------|-------------------|----------------------|-----------------|------------------------------|----------|-----------|-----------|-----------|-----------|-----------|-----------|
| OTU1   | Basidiomycota | Cystobasidiomycetes | Cystobasidiales   | Cystobasidiaceae     | Cystobasidium   | Cystobasidium sp             | 24307    | 17780     | 63813     | 43210     | 56886     | 149756    | 5879      |
| OTU2   | Basidiomycota | Pucciniomycetes     | Septobasidiales   | Septobasidiaceae     | Septobasidium   | Septobasidium carestianum    | 1842     | 73        | 5447      | 2297      | 2417      | 268608    | 7421      |
| OTU3   | Basidiomycota | Cystobasidiomycetes | Erythrobasidiales | Microsporomycetaceae | Microsporomyces | Microsporomyces sp           | 16928    | 2665      | 26441     | 3359      | 3182      | 9         | 5687      |
| OTU4   | Basidiomycota | Cystobasidiomycetes | Erythrobasidiales | Microsporomycetaceae | Microsporomyces | Microsporomyces ellipsoideus | 4        | 0         | 2         | 55757     | 3         | 1         | 0         |
| OTU5   | Basidiomycota | Pucciniomycetes     | Septobasidiales   | Septobasidiaceae     | Septobasidium   | Septobasidium sp             | 1638     | 70        | 7223      | 5         | 8638      | 14901     | 15797     |
| OTU6   | Basidiomycota | Cystobasidiomycetes | Erythrobasidiales | Microsporomycetaceae | Microsporomyces | Cystobasidiomycetes sp       | 4        | 0         | 3         | 18323     | 4         | 3         | 2         |
| OTU7   | Basidiomycota | Cystobasidiomycetes | Erythrobasidiales | Microsporomycetaceae | Microsporomyces | Microsporomyces sp           | 28265    | 1         | 2         | 3         | 3         | 0         | 1         |
| OTU8   | Basidiomycota | Pucciniomycetes     | Septobasidiales   | Septobasidiaceae     | Unidentified    | Septobasidiaceae sp          | 334      | 1133      | 28963     | 987       | 529       | 5136      | 2427      |
| OTU9   | Basidiomycota | Cystobasidiomycetes | Cystobasidiales   | Cystobasidiaceae     | Occultifur      | Occultifur mephitis          | 23920    | 2         | 369       | 10        | 175       | 28        | 4         |
| OTU10  | Basidiomycota | Pucciniomycetes     | Septobasidiales   | Septobasidiaceae     | Unidentified    | Septobasidiaceae sp          | 4        | 444       | 23716     | 1         | 5         | 19        | 16        |
| OTU11  | Basidiomycota | Cystobasidiomycetes | Erythrobasidiales | Microsporomycetaceae | Microsporomyces | Microsporomyces sp           | 9019     | 510       | 17938     | 1215      | 29917     | 5         | 1498      |
| OTU12  | Basidiomycota | Pucciniomycetes     | Septobasidiales   | Septobasidiaceae     | Septobasidium   | Septobasidium velutinum      | 2        | 97        | 7338      | 2         | 222       | 27        | 20839     |
| OTU13  | Basidiomycota | Pucciniomycetes     | Septobasidiales   | Septobasidiaceae     | Septobasidium   | Septobasidium pallidum       | 0        | 1         | 18651     | 0         | 0         | 16        | 8         |
| OTU14  | Basidiomycota | Cystobasidiomycetes | Erythrobasidiales | Buckleyzymaceae      | Buckleyzyma     | Buckleyzyma aurantiaca       | 1707     | 1827      | 2450      | 1302      | 2717      | 5564      | 427       |
| OTU15  | Basidiomycota | Cystobasidiomycetes | Erythrobasidiales | Unidentified         | Unidentified    | Erythrobasidiales sp         | 827      | 124       | 15696     | 3161      | 6777      | 1382      | 34        |
| OTU16  | Basidiomycota | Cystobasidiomycetes | Erythrobasidiales | Unidentified         | Unidentified    | Erythrobasidiales sp         | 396      | 12        | 7076      | 2472      | 2176      | 1134      | 12        |
| OTU17  | Basidiomycota | Pucciniomycetes     | Septobasidiales   | Septobasidiaceae     | Unidentified    | Septobasidiaceae sp          | 11       | 1         | 1163      | 5739      | 993       | 1249      | 27        |
| OTU18  | Basidiomycota | Cystobasidiomycetes | Erythrobasidiales | Microsporomycetaceae | Unidentified    | Microsporomycetaceae sp      | 8646     | 1         | 22        | 402       | 18        | 2         | 0         |
| OTU19  | Basidiomycota | Cystobasidiomycetes | Erythrobasidiales | Erythrobasidiaceae   | Erythrobasidium | Erythrobasidium sp           | 7633     | 37        | 542       | 68        | 1         | 1         | 1         |
| OTU20  | Basidiomycota | Cystobasidiomycetes | Erythrobasidiales | Erythrobasidiaceae   | Erythrobasidium | Erythrobasidium sp           | 2495     | 4         | 103       | 12        | 0         | 0         | 0         |
| OTU21  | Basidiomycota | Cystobasidiomycetes | Erythrobasidiales | Unidentified         | Unidentified    | Erythrobasidiales sp         | 5317     | 0         | 8         | 886       | 807       | 5         | 90        |
| OTU22  | Basidiomycota | Tremellomycetes     | Tremellales       | Carcinomycetaceae    | Carcinomyces    | Carcinomyces polyporinus     | 1        | 2         | 2         | 0         | 3748      | 0         | 1         |
| OTU23  | Basidiomycota | Pucciniomycetes     | Septobasidiales   | Septobasidiaceae     | Septobasidium   | Septobasidium sp             | 635      | 0         | 3563      | 2         | 2         | 7         | 67        |
| OTU24  | Basidiomycota | Cystobasidiomycetes | Erythrobasidiales | Erythrobasidiaceae   | Erythrobasidium | Erythrobasidium sp           | 9164     | 36        | 4         | 373       | 345       | 2         | 15        |
| OTU25  | Basidiomycota | Cystobasidiomycetes | Erythrobasidiales | Erythrobasidiaceae   | Erythrobasidium | Erythrobasidium sp           | 6056     | 5         | 0         | 162       | 116       | 0         | 3         |

|       |               |                     |                   |                      |                 |                         |      |     |       |      |      |      |      |
|-------|---------------|---------------------|-------------------|----------------------|-----------------|-------------------------|------|-----|-------|------|------|------|------|
| OTU26 | Basidiomycota | Pucciniomycetes     | Septobasidiales   | Septobasidiaceae     | Unidentified    | Septobasidiaceae sp     | 0    | 0   | 3433  | 0    | 1    | 1    | 0    |
| OTU27 | Basidiomycota | Cystobasidiomycetes | Erythrobasidiales | Unidentified         | Unidentified    | Erythrobasidiales sp    | 5512 | 0   | 159   | 6    | 955  | 0    | 46   |
| OTU28 | Basidiomycota | Pucciniomycetes     | Septobasidiales   | Septobasidiaceae     | Septobasidium   | Septobasidium sp        | 29   | 0   | 7     | 2    | 6    | 4202 | 330  |
| OTU29 | Basidiomycota | Pucciniomycetes     | Septobasidiales   | Septobasidiaceae     | Septobasidium   | Septobasidium sp        | 0    | 0   | 6     | 2    | 3    | 3165 | 8    |
| OTU30 | Basidiomycota | Cystobasidiomycetes | Erythrobasidiales | Microsporomycetaceae | Microsporomyces | Lichenozyma pisutiana   | 7    | 0   | 17    | 9    | 17   | 7    | 3346 |
| OTU31 | Basidiomycota | Pucciniomycetes     | Septobasidiales   | Septobasidiaceae     | Unidentified    | Septobasidiaceae sp     | 15   | 0   | 778   | 1    | 3093 | 14   | 30   |
| OTU32 | Basidiomycota | Microbotryomycetes  | Unidentified      | Unidentified         | Unidentified    | Microbotryomycetes sp   | 1590 | 0   | 0     | 137  | 163  | 1    | 19   |
| OTU33 | Basidiomycota | Cystobasidiomycetes | Erythrobasidiales | Unidentified         | Unidentified    | Erythrobasidiales sp    | 2492 | 0   | 50    | 0    | 226  | 0    | 8    |
| OTU34 | Basidiomycota | Cystobasidiomycetes | Erythrobasidiales | Unidentified         | Unidentified    | Erythrobasidiales sp    | 102  | 230 | 10704 | 782  | 3    | 255  | 0    |
| OTU35 | Unidentified  | Unidentified        | Unidentified      | Unidentified         | Unidentified    | Fungi sp                | 14   | 0   | 2324  | 0    | 0    | 0    | 0    |
| OTU36 | Basidiomycota | Pucciniomycetes     | Septobasidiales   | Septobasidiaceae     | Septobasidium   | Septobasidium sinuosum  | 0    | 0   | 5458  | 0    | 0    | 5    | 0    |
| OTU37 | Basidiomycota | Cystobasidiomycetes | Erythrobasidiales | Unidentified         | Unidentified    | Erythrobasidiales sp    | 14   | 31  | 2213  | 317  | 0    | 1    | 0    |
| OTU38 | Basidiomycota | Pucciniomycetes     | Septobasidiales   | Septobasidiaceae     | Septobasidium   | Septobasidium velutinum | 1    | 0   | 125   | 1    | 3    | 41   | 2902 |
| OTU39 | Basidiomycota | Cystobasidiomycetes | Erythrobasidiales | Symmetrosporaceae    | Symmetrospora   | Symmetrospora sp        | 1896 | 0   | 617   | 0    | 3    | 0    | 0    |
| OTU40 | Basidiomycota | Cystobasidiomycetes | Erythrobasidiales | Erythrobasidiaceae   | Erythrobasidium | Erythrobasidium sp      | 4409 | 3   | 13    | 8    | 634  | 236  | 142  |
| OTU41 | Basidiomycota | Pucciniomycetes     | Platyglloeales    | Eocronartiaceae      | Eocronartium    | Eocronartium sp         | 1    | 0   | 15    | 4230 | 25   | 6    | 10   |
| OTU42 | Basidiomycota | Cystobasidiomycetes | Naohideales       | Naohideaceae         | Naohidea        | Naohidea sp             | 2239 | 0   | 1     | 0    | 0    | 0    | 0    |
| OTU43 | Basidiomycota | Pucciniomycetes     | Septobasidiales   | Septobasidiaceae     | Septobasidium   | Septobasidium sp        | 22   | 0   | 373   | 0    | 120  | 4115 | 468  |
| OTU44 | Basidiomycota | Cystobasidiomycetes | Erythrobasidiales | Erythrobasidiaceae   | Erythrobasidium | Erythrobasidium sp      | 1730 | 0   | 0     | 0    | 161  | 24   | 30   |
| OTU45 | Basidiomycota | Pucciniomycetes     | Septobasidiales   | Septobasidiaceae     | Septobasidium   | Septobasidium velutinum | 0    | 0   | 2     | 0    | 0    | 10   | 2083 |
| OTU46 | Basidiomycota | Pucciniomycetes     | Septobasidiales   | Septobasidiaceae     | Septobasidium   | Septobasidium sp        | 1761 | 0   | 645   | 1    | 349  | 33   | 25   |
| OTU47 | Basidiomycota | Cystobasidiomycetes | Erythrobasidiales | Unidentified         | Unidentified    | Erythrobasidiales sp    | 1264 | 1   | 6     | 111  | 572  | 1    | 50   |
| OTU48 | Basidiomycota | Tremellomycetes     | Tremellales       | Cuniculitremaeae     | Kockovaella     | Kockovaella sp          | 122  | 26  | 1370  | 0    | 0    | 0    | 0    |
| OTU49 | Basidiomycota | Pucciniomycetes     | Septobasidiales   | Septobasidiaceae     | Septobasidium   | Septobasidium velutinum | 0    | 0   | 14    | 0    | 1257 | 8    | 6    |
| OTU50 | Basidiomycota | Microbotryomycetes  | Sporidiobolales   | Sporidiobolaceae     | Sporobolomyces  | Sporobolomyces sp       | 1895 | 0   | 1     | 0    | 1    | 1    | 5    |
| OTU51 | Basidiomycota | Pucciniomycetes     | Septobasidiales   | Septobasidiaceae     | Septobasidium   | Septobasidium sp        | 1358 | 1   | 31    | 3    | 2    | 9    | 7    |
| OTU52 | Basidiomycota | Cystobasidiomycetes | Erythrobasidiales | Erythrobasidiaceae   | Erythrobasidium | Erythrobasidium sp      | 8    | 0   | 1371  | 723  | 0    | 0    | 0    |
| OTU53 | Basidiomycota | Tremellomycetes     | Tremellales       | Bulleribasidiaceae   | Hannaella       | Hannaella kunmingensis  | 0    | 3   | 329   | 30   | 340  | 181  | 0    |
| OTU54 | Basidiomycota | Pucciniomycetes     | Septobasidiales   | Septobasidiaceae     | Septobasidium   | Septobasidium sp        | 1    | 0   | 1025  | 0    | 1    | 0    | 0    |
| OTU55 | Basidiomycota | Pucciniomycetes     | Septobasidiales   | Septobasidiaceae     | Unidentified    | Septobasidiaceae sp     | 2    | 0   | 22    | 420  | 1081 | 16   | 14   |
| OTU56 | Basidiomycota | Pucciniomycetes     | Septobasidiales   | Septobasidiaceae     | Unidentified    | Septobasidiaceae sp     | 0    | 0   | 1841  | 2    | 1    | 1    | 0    |

|       |               |                     |                    |                      |                 |                                  |      |     |      |      |      |      |     |
|-------|---------------|---------------------|--------------------|----------------------|-----------------|----------------------------------|------|-----|------|------|------|------|-----|
| OTU57 | Basidiomycota | Pucciniomycetes     | Septobasidiales    | Septobasidiaceae     | Unidentified    | Septobasidiaceae sp              | 959  | 0   | 19   | 4    | 20   | 12   | 29  |
| OTU58 | Basidiomycota | Cystobasidiomycetes | Erythrobasidiales  | Microsporomycetaceae | Unidentified    | Microsporomycetaceae sp          | 489  | 46  | 1814 | 5    | 1344 | 0    | 0   |
| OTU59 | Basidiomycota | Pucciniomycetes     | Septobasidiales    | Septobasidiaceae     | Septobasidium   | Septobasidium velutinum          | 1    | 0   | 999  | 0    | 0    | 0    | 0   |
| OTU60 | Basidiomycota | Pucciniomycetes     | Septobasidiales    | Septobasidiaceae     | Septobasidium   | Septobasidium velutinum          | 0    | 0   | 677  | 0    | 0    | 437  | 1   |
| OTU61 | Basidiomycota | Cystobasidiomycetes | Cystobasidiales    | Cystobasidiaceae     | Cystobasidium   | Cystobasidium sp                 | 11   | 3   | 38   | 29   | 33   | 883  | 6   |
| OTU62 | Basidiomycota | Pucciniomycetes     | Septobasidiales    | Septobasidiaceae     | Septobasidium   | Septobasidium carestianum        | 4    | 2   | 8    | 5    | 1    | 1135 | 16  |
| OTU63 | Basidiomycota | Microbotryomycetes  | Sporidiobolales    | Sporidiobolaceae     | Sporobolomyces  | Sporobolomyces sp                | 741  | 0   | 0    | 0    | 0    | 0    | 13  |
| OTU64 | Basidiomycota | Cystobasidiomycetes | Erythrobasidiales  | Microsporomycetaceae | Unidentified    | Microsporomycetaceae sp          | 795  | 1   | 3    | 0    | 3    | 0    | 64  |
| OTU65 | Basidiomycota | Cystobasidiomycetes | Erythrobasidiales  | Erythrobasidiaceae   | Erythrobasidium | Erythrobasidium sp               | 434  | 0   | 342  | 308  | 1    | 0    | 0   |
| OTU66 | Basidiomycota | Cystobasidiomycetes | Erythrobasidiales  | Buckleyzymaceae      | Buckleyzyma     | Buckleyzyma aurantiaca           | 1    | 0   | 6    | 1    | 3    | 783  | 0   |
| OTU67 | Basidiomycota | Pucciniomycetes     | Septobasidiales    | Septobasidiaceae     | Septobasidium   | Septobasidium velutinum          | 135  | 0   | 847  | 3    | 4    | 2    | 1   |
| OTU68 | Basidiomycota | Pucciniomycetes     | Platyglloeales     | Platyglloeaceae      | Platyglloea     | Platyglloea disciformis          | 1    | 0   | 8    | 19   | 1347 | 7    | 10  |
| OTU69 | Basidiomycota | Microbotryomycetes  | Sporidiobolales    | Sporidiobolaceae     | Sporobolomyces  | Sporobolomyces sp                | 776  | 0   | 0    | 0    | 0    | 1    | 0   |
| OTU70 | Basidiomycota | Cystobasidiomycetes | Erythrobasidiales  | Erythrobasidiaceae   | Erythrobasidium | Erythrobasidium sp               | 1120 | 0   | 128  | 48   | 2    | 0    | 0   |
| OTU71 | Unidentified  | Unidentified        | Unidentified       | Unidentified         | Unidentified    | Fungi sp                         | 0    | 0   | 3    | 0    | 296  | 204  | 0   |
| OTU72 | Basidiomycota | Pucciniomycetes     | Septobasidiales    | Septobasidiaceae     | Septobasidium   | Septobasidium mariani            | 1    | 0   | 4    | 0    | 546  | 2    | 3   |
| OTU73 | Basidiomycota | Cystobasidiomycetes | Erythrobasidiales  | Microsporomycetaceae | Microsporomyces | Microsporomyces pini             | 1    | 199 | 0    | 1884 | 2    | 2    | 0   |
| OTU74 | Basidiomycota | Pucciniomycetes     | Septobasidiales    | Septobasidiaceae     | Septobasidium   | Septobasidium pseudopedicellatum | 1    | 0   | 14   | 133  | 532  | 9    | 5   |
| OTU75 | Basidiomycota | Microbotryomycetes  | Sporidiobolales    | Unidentified         | Unidentified    | Sporidiobolales sp               | 0    | 0   | 0    | 0    | 557  | 1    | 0   |
| OTU76 | Basidiomycota | Cystobasidiomycetes | Erythrobasidiales  | Microsporomycetaceae | Microsporomyces | Microsporomyces sp               | 1    | 0   | 0    | 674  | 0    | 1    | 0   |
| OTU77 | Basidiomycota | Tremellomycetes     | Tremellales        | Trimorphomycetaceae  | Saitozyma       | Saitozyma sp                     | 262  | 20  | 161  | 1    | 0    | 1    | 0   |
| OTU78 | Basidiomycota | Cystobasidiomycetes | Erythrobasidiales  | Erythrobasidiaceae   | Erythrobasidium | Erythrobasidium sp               | 0    | 0   | 476  | 184  | 0    | 0    | 0   |
| OTU79 | Basidiomycota | Pucciniomycetes     | Septobasidiales    | Septobasidiaceae     | Septobasidium   | Septobasidium velutinum          | 0    | 0   | 0    | 0    | 0    | 0    | 493 |
| OTU80 | Ascomycota    | Arthoniomycetes     | Arthoniales        | Roccellaceae         | Gyrographa      | Gyrographa gyrocarpa             | 6    | 1   | 496  | 2    | 0    | 0    | 0   |
| OTU81 | Basidiomycota | Cystobasidiomycetes | Cystobasidiales    | Cystobasidiaceae     | Cystobasidium   | Cystobasidium sp                 | 1    | 505 | 2    | 0    | 0    | 2    | 0   |
| OTU82 | Basidiomycota | Pucciniomycetes     | Septobasidiales    | Septobasidiaceae     | Septobasidium   | Septobasidium carestianum        | 0    | 0   | 2    | 1    | 418  | 5    | 69  |
| OTU83 | Basidiomycota | Microbotryomycetes  | Microbotryomycetes | Microbotryomycetes   | Colacogloea     | Colacogloea sp                   | 1150 | 0   | 2    | 0    | 0    | 1    | 0   |
| OTU84 | Basidiomycota | Cystobasidiomycetes | Erythrobasidiales  | Erythrobasidiaceae   | Erythrobasidium | Erythrobasidium sp               | 708  | 0   | 3    | 4    | 2    | 171  | 0   |
| OTU85 | Basidiomycota | Microbotryomycetes  | Microbotryomycetes | Microbotryomycetes   | Colacogloea     | Colacogloea sp                   | 477  | 0   | 0    | 0    | 0    | 0    | 0   |

|        |               |                     |                   |                      |                 |                                  |     |     |     |     |     |     |     |
|--------|---------------|---------------------|-------------------|----------------------|-----------------|----------------------------------|-----|-----|-----|-----|-----|-----|-----|
| OTU86  | Basidiomycota | Cystobasidiomycetes | Erythrobasidiales | Erythrobasidiaceae   | Erythrobasidium | Erythrobasidium sp               | 103 | 0   | 62  | 75  | 1   | 0   | 0   |
| OTU87  | Basidiomycota | Cystobasidiomycetes | Erythrobasidiales | Unidentified         | Unidentified    | Cystobasidiales sp               | 486 | 0   | 334 | 1   | 0   | 0   | 0   |
| OTU88  | Basidiomycota | Pucciniomycetes     | Septobasidiales   | Septobasidiaceae     | Septobasidium   | Septobasidium sp                 | 0   | 0   | 1   | 0   | 0   | 439 | 0   |
| OTU89  | Basidiomycota | Cystobasidiomycetes | Erythrobasidiales | Erythrobasidiaceae   | Erythrobasidium | Erythrobasidium sp               | 142 | 0   | 2   | 709 | 5   | 0   | 0   |
| OTU90  | Basidiomycota | Cystobasidiomycetes | Erythrobasidiales | Symmetrosporaceae    | Symmetrospora   | Symmetrospora sp                 | 0   | 0   | 364 | 0   | 197 | 0   | 0   |
| OTU91  | Basidiomycota | Pucciniomycetes     | Septobasidiales   | Septobasidiaceae     | Septobasidium   | Septobasidium pseudopedicellatum | 338 | 0   | 11  | 2   | 1   | 6   | 5   |
| OTU92  | Basidiomycota | Pucciniomycetes     | Septobasidiales   | Septobasidiaceae     | Septobasidium   | Septobasidium pallidum           | 0   | 0   | 8   | 343 | 2   | 6   | 6   |
| OTU93  | Basidiomycota | Pucciniomycetes     | Septobasidiales   | Septobasidiaceae     | Septobasidium   | Septobasidium sp                 | 0   | 0   | 346 | 0   | 4   | 1   | 2   |
| OTU94  | Basidiomycota | Cystobasidiomycetes | Erythrobasidiales | Microsporomycetaceae | Microsporomyces | Microsporomyces sp               | 0   | 0   | 2   | 84  | 631 | 0   | 1   |
| OTU95  | Unidentified  | Unidentified        | Unidentified      | Unidentified         | Unidentified    | Fungi sp                         | 0   | 139 | 206 | 1   | 2   | 5   | 0   |
| OTU96  | Basidiomycota | Cystobasidiomycetes | Unidentified      | Unidentified         | Unidentified    | Cystobasidiomycetes sp           | 449 | 0   | 0   | 1   | 1   | 1   | 0   |
| OTU97  | Basidiomycota | Pucciniomycetes     | Septobasidiales   | Septobasidiaceae     | Septobasidium   | Septobasidium pseudopedicellatum | 0   | 0   | 303 | 5   | 1   | 0   | 0   |
| OTU98  | Basidiomycota | Cystobasidiomycetes | Erythrobasidiales | Erythrobasidiaceae   | Erythrobasidium | Erythrobasidium sp               | 375 | 0   | 24  | 2   | 1   | 0   | 0   |
| OTU99  | Basidiomycota | Pucciniomycetes     | Septobasidiales   | Septobasidiaceae     | Septobasidium   | Septobasidium sp                 | 0   | 0   | 276 | 0   | 0   | 0   | 0   |
| OTU100 | Basidiomycota | Tremellomycetes     | Tremellales       | Tremellaceae         | Cryptococcus    | Cryptococcus sp                  | 90  | 142 | 1   | 0   | 1   | 0   | 0   |
| OTU101 | Basidiomycota | Cystobasidiomycetes | Erythrobasidiales | Unidentified         | Unidentified    | Erythrobasidiales sp             | 1   | 0   | 350 | 0   | 0   | 0   | 0   |
| OTU102 | Basidiomycota | Cystobasidiomycetes | Erythrobasidiales | Erythrobasidiaceae   | Bannoa          | Bannoa ogasawarensis             | 793 | 0   | 2   | 47  | 159 | 0   | 42  |
| OTU103 | Basidiomycota | Tremellomycetes     | Tremellales       | Syzygosporaceae      | Syzygospora     | Syzygospora effibulata           | 61  | 60  | 187 | 0   | 0   | 0   | 0   |
| OTU104 | Basidiomycota | Pucciniomycetes     | Septobasidiales   | Septobasidiaceae     | Unidentified    | Septobasidiaceae sp              | 0   | 0   | 280 | 0   | 0   | 0   | 0   |
| OTU105 | Basidiomycota | Pucciniomycetes     | Septobasidiales   | Septobasidiaceae     | Septobasidium   | Septobasidium sp                 | 0   | 0   | 2   | 0   | 265 | 3   | 1   |
| OTU106 | Basidiomycota | Cystobasidiomycetes | Erythrobasidiales | Microsporomycetaceae | Unidentified    | Microsporomycetaceae sp          | 0   | 0   | 0   | 290 | 0   | 1   | 0   |
| OTU107 | Basidiomycota | Pucciniomycetes     | Septobasidiales   | Septobasidiaceae     | Unidentified    | Septobasidiaceae sp              | 274 | 0   | 5   | 5   | 12  | 11  | 4   |
| OTU108 | Basidiomycota | Tremellomycetes     | Tremellales       | Cuniculitremaeae     | Kockovaella     | Kockovaella sp                   | 0   | 0   | 261 | 1   | 0   | 0   | 0   |
| OTU109 | Basidiomycota | Pucciniomycetes     | Septobasidiales   | Septobasidiaceae     | Septobasidium   | Septobasidium velutinum          | 0   | 0   | 1   | 0   | 0   | 1   | 253 |
| OTU110 | Basidiomycota | Pucciniomycetes     | Septobasidiales   | Septobasidiaceae     | Septobasidium   | Septobasidium velutinum          | 0   | 0   | 286 | 0   | 1   | 0   | 0   |
| OTU111 | Basidiomycota | Cystobasidiomycetes | Erythrobasidiales | Symmetrosporaceae    | Symmetrospora   | Symmetrospora symmetrica         | 14  | 0   | 3   | 2   | 355 | 2   | 37  |
| OTU112 | Basidiomycota | Cystobasidiomycetes | Erythrobasidiales | Erythrobasidiaceae   | Erythrobasidium | Erythrobasidium sp               | 217 | 0   | 0   | 0   | 0   | 29  | 0   |
| OTU113 | Basidiomycota | Cystobasidiomycetes | Erythrobasidiales | Erythrobasidiaceae   | Bannoa          | Bannoa ogasawarensis             | 236 | 0   | 0   | 378 | 127 | 1   | 0   |
| OTU114 | Basidiomycota | Cystobasidiomycetes | Cystobasidiales   | Cystobasidiaceae     | Occultifur      | Occultifur mephitis              | 4   | 0   | 1   | 0   | 246 | 1   | 0   |
| OTU115 | Basidiomycota | Cystobasidiomycetes | Erythrobasidiales | Erythrobasidiaceae   | Bannoa          | Bannoa ogasawarensis             | 330 | 62  | 1   | 113 | 118 | 1   | 10  |

|        |               |                     |                   |                      |                    |                                  |     |     |      |     |     |     |     |
|--------|---------------|---------------------|-------------------|----------------------|--------------------|----------------------------------|-----|-----|------|-----|-----|-----|-----|
| OTU116 | Basidiomycota | Cystobasidiomycetes | Erythrobasidiales | Erythrobasidiaceae   | Erythrobasidium    | Erythrobasidium sp               | 1   | 1   | 2    | 499 | 0   | 0   | 0   |
| OTU117 | Basidiomycota | Agaricomycetes      | Agaricales        | Marasmiaceae         | Marasmius          | Marasmius sp                     | 0   | 0   | 0    | 686 | 0   | 0   | 1   |
| OTU118 | Basidiomycota | Pucciniomycetes     | Septobasidiales   | Septobasidiaceae     | Septobasidium      | Septobasidium velutinum          | 0   | 0   | 196  | 0   | 0   | 0   | 0   |
| OTU119 | Basidiomycota | Cystobasidiomycetes | Erythrobasidiales | Erythrobasidiaceae   | Erythrobasidium    | Erythrobasidium sp               | 44  | 0   | 0    | 271 | 0   | 0   | 0   |
| OTU120 | Basidiomycota | Cystobasidiomycetes | Erythrobasidiales | Unidentified         | Unidentified       | Erythrobasidiales sp             | 89  | 0   | 6767 | 135 | 1   | 74  | 0   |
| OTU121 | Basidiomycota | Pucciniomycetes     | Septobasidiales   | Septobasidiaceae     | Septobasidium      | Septobasidium velutinum          | 0   | 0   | 0    | 0   | 0   | 1   | 216 |
| OTU122 | Basidiomycota | Tremellomycetes     | Tremellales       | Carcinomycetaceae    | Carcinomyces       | Carcinomyces polyporinus         | 0   | 128 | 2    | 0   | 55  | 1   | 0   |
| OTU123 | Basidiomycota | Cystobasidiomycetes | Cystobasidiales   | Cystobasidiaceae     | Occultifur         | Occultifur mephitis              | 218 | 0   | 4    | 0   | 4   | 0   | 0   |
| OTU124 | Ascomycota    | Arthoniomycetes     | Arthoniales       | Opegraphaceae        | Opegrapha          | Opegrapha vermicellifera         | 130 | 0   | 44   | 0   | 1   | 0   | 0   |
| OTU125 | Basidiomycota | Cystobasidiomycetes | Erythrobasidiales | Erythrobasidiaceae   | Bannoa             | Bannoa ogasawarensis             | 348 | 0   | 0    | 1   | 0   | 0   | 0   |
| OTU126 | Basidiomycota | Cystobasidiomycetes | Cystobasidiales   | Cystobasidiaceae     | Occultifur         | Occultifur sp                    | 112 | 0   | 0    | 0   | 0   | 0   | 0   |
| OTU127 | Basidiomycota | Cystobasidiomycetes | Erythrobasidiales | Unidentified         | Unidentified       | Erythrobasidiales sp             | 86  | 0   | 1716 | 11  | 2   | 346 | 14  |
| OTU128 | Basidiomycota | Cystobasidiomycetes | Erythrobasidiales | Unidentified         | Unidentified       | Erythrobasidiales sp             | 1   | 0   | 3    | 111 | 943 | 1   | 11  |
| OTU129 | Basidiomycota | Cystobasidiomycetes | Erythrobasidiales | Erythrobasidiaceae   | Bannoa             | Bannoa ogasawarensis             | 64  | 13  | 0    | 56  | 46  | 0   | 1   |
| OTU130 | Basidiomycota | Microbotryomycetes  | Sporidiobolales   | Sporidiobolaceae     | Rhodosporidiobolus | Rhodosporidiobolus sp            | 0   | 0   | 0    | 214 | 0   | 0   | 0   |
| OTU131 | Basidiomycota | Pucciniomycetes     | Septobasidiales   | Septobasidiaceae     | Septobasidium      | Septobasidium pseudopedicellatum | 0   | 0   | 1    | 0   | 122 | 1   | 1   |
| OTU132 | Basidiomycota | Cystobasidiomycetes | Erythrobasidiales | Microsporomycetaceae | Microsporomyces    | Microsporomyces sp               | 0   | 0   | 0    | 25  | 153 | 0   | 0   |
| OTU133 | Basidiomycota | Tremellomycetes     | Tremellales       | Unidentified         | Unidentified       | Tremellales sp                   | 99  | 0   | 0    | 0   | 0   | 0   | 0   |
| OTU134 | Basidiomycota | Tremellomycetes     | Tremellales       | Cuniculitremaeae     | Kockovaella        | Kockovaella prillingeri          | 2   | 0   | 260  | 1   | 0   | 0   | 1   |
| OTU135 | Basidiomycota | Cystobasidiomycetes | Erythrobasidiales | Erythrobasidiaceae   | Erythrobasidium    | Erythrobasidium sp               | 0   | 0   | 0    | 83  | 0   | 0   | 0   |
| OTU136 | Basidiomycota | Agaricomycetes      | Agaricales        | Inocybaceae          | Inocybe            | Inocybe sp                       | 0   | 0   | 134  | 0   | 0   | 0   | 0   |
| OTU137 | Basidiomycota | Cystobasidiomycetes | Erythrobasidiales | Erythrobasidiaceae   | Erythrobasidium    | Erythrobasidium sp               | 0   | 0   | 0    | 145 | 0   | 0   | 0   |
| OTU138 | Basidiomycota | Pucciniomycetes     | Septobasidiales   | Septobasidiaceae     | Septobasidium      | Septobasidium pallidum           | 0   | 0   | 0    | 0   | 0   | 98  | 5   |
| OTU139 | Basidiomycota | Cystobasidiomycetes | Naohideales       | Naohideaceae         | Naohidea           | Naohidea sebacea                 | 92  | 0   | 0    | 0   | 0   | 0   | 0   |
| OTU140 | Basidiomycota | Cystobasidiomycetes | Erythrobasidiales | Sakaguchiaceae       | Sakaguchia         | Sakaguchia lamellibrachiae       | 0   | 0   | 0    | 106 | 0   | 0   | 0   |
| OTU141 | Basidiomycota | Tremellomycetes     | Tremellales       | Unidentified         | Unidentified       | Tremellales sp                   | 10  | 0   | 79   | 0   | 0   | 0   | 0   |
| OTU142 | Basidiomycota | Cystobasidiomycetes | Naohideales       | Naohideaceae         | Naohidea           | Naohidea sebacea                 | 0   | 0   | 0    | 83  | 0   | 0   | 0   |
| OTU143 | Basidiomycota | Cystobasidiomycetes | Erythrobasidiales | Sakaguchiaceae       | Sakaguchia         | Sakaguchia dacryoidea            | 125 | 0   | 0    | 0   | 0   | 0   | 0   |
| OTU144 | Basidiomycota | Microbotryomycetes  | Sporidiobolales   | Sporidiobolaceae     | Rhodosporidiobolus | Rhodosporidiobolus sp            | 0   | 0   | 0    | 47  | 0   | 0   | 0   |
| OTU145 | Unidentified  | Unidentified        | Unidentified      | Unidentified         | Unidentified       | Fungi sp                         | 0   | 0   | 0    | 0   | 58  | 2   | 0   |



|        |               |                     |                    |                     |                    |                              |     |    |    |     |    |    |    |
|--------|---------------|---------------------|--------------------|---------------------|--------------------|------------------------------|-----|----|----|-----|----|----|----|
| OTU146 | Basidiomycota | Pucciniomycetes     | Septobasidiales    | Septobasidiaceae    | Septobasidium      | Septobasidium pallidum       | 0   | 0  | 1  | 0   | 0  | 76 | 18 |
| OTU147 | Basidiomycota | Cystobasidiomycetes | Erythrobasidiales  | Erythrobasidiaceae  | Erythrobasidium    | Erythrobasidium hasegawianum | 0   | 0  | 94 | 0   | 0  | 0  | 0  |
| OTU148 | Basidiomycota | Pucciniomycetes     | Septobasidiales    | Septobasidiaceae    | Septobasidium      | Septobasidium ramorum        | 0   | 0  | 0  | 0   | 2  | 0  | 57 |
| OTU149 | Basidiomycota | Microbotryomycetes  | Sporidiobolales    | Sporidiobolaceae    | Rhodosporidiobolus | Rhodosporidiobolus fluvialis | 10  | 0  | 0  | 96  | 0  | 0  | 0  |
| OTU150 | Basidiomycota | Tremellomycetes     | Tremellales        | Bulleribasidiaceae  | Hannaella          | Hannaella phetchabunensis    | 0   | 0  | 49 | 0   | 0  | 0  | 0  |
| OTU151 | Basidiomycota | Pucciniomycetes     | Platyglloeales     | Eocronartiaceae     | Eocronartium       | Eocronartium sp              | 0   | 0  | 0  | 62  | 0  | 0  | 0  |
| OTU152 | Basidiomycota | Cystobasidiomycetes | Erythrobasidiales  | Erythrobasidiaceae  | Bannoa             | Bannoa sp                    | 1   | 0  | 3  | 0   | 0  | 68 | 0  |
| OTU153 | Basidiomycota | Cystobasidiomycetes | Erythrobasidiales  | Sakaguchiaceae      | Sakaguchia         | Sakaguchia dacryoidea        | 31  | 0  | 0  | 0   | 0  | 0  | 0  |
| OTU154 | Basidiomycota | Cystobasidiomycetes | Cystobasidiales    | Cystobasidiaceae    | Occultifur         | Occultifur sp                | 73  | 0  | 0  | 0   | 0  | 0  | 0  |
| OTU155 | Unidentified  | Unidentified        | Unidentified       | Unidentified        | Unidentified       | Fungi sp                     | 0   | 0  | 0  | 0   | 54 | 0  | 1  |
| OTU156 | Basidiomycota | Cystobasidiomycetes | Erythrobasidiales  | Unidentified        | Unidentified       | Erythrobasidiales sp         | 0   | 0  | 0  | 0   | 64 | 0  | 0  |
| OTU157 | Basidiomycota | Tremellomycetes     | Tremellales        | Cuniculitremaeae    | Kockovaella        | Kockovaella sp               | 6   | 0  | 14 | 19  | 1  | 0  | 0  |
| OTU158 | Basidiomycota | Cystobasidiomycetes | Cystobasidiales    | Cystobasidiaceae    | Cystobasidium      | Cystobasidium sp             | 58  | 0  | 1  | 0   | 2  | 5  | 0  |
| OTU159 | Basidiomycota | Pucciniomycetes     | Septobasidiales    | Septobasidiaceae    | Septobasidium      | Septobasidium pallidum       | 0   | 0  | 88 | 0   | 0  | 1  | 0  |
| OTU160 | Basidiomycota | Pucciniomycetes     | Septobasidiales    | Septobasidiaceae    | Unidentified       | Septobasidiaceae sp          | 0   | 0  | 1  | 100 | 0  | 0  | 1  |
| OTU161 | Basidiomycota | Pucciniomycetes     | Septobasidiales    | Septobasidiaceae    | Septobasidium      | Septobasidium carestianum    | 0   | 0  | 0  | 0   | 46 | 0  | 1  |
| OTU162 | Basidiomycota | Microbotryomycetes  | Microbotryomycetes | Chrysozymaceae      | Oberwinklerozyma   | Oberwinklerozyma sp          | 33  | 24 | 7  | 0   | 0  | 0  | 0  |
| OTU163 | Basidiomycota | Pucciniomycetes     | Septobasidiales    | Septobasidiaceae    | Septobasidium      | Septobasidium kameii         | 0   | 0  | 0  | 0   | 0  | 0  | 44 |
| OTU164 | Basidiomycota | Cystobasidiomycetes | Erythrobasidiales  | Erythrobasidiaceae  | Erythrobasidium    | Erythrobasidium hasegawianum | 0   | 0  | 0  | 20  | 0  | 0  | 0  |
| OTU165 | Basidiomycota | Microbotryomycetes  | Microbotryomycetes | Chrysozymaceae      | Bannozya           | Bannozya sp                  | 0   | 0  | 0  | 66  | 0  | 1  | 0  |
| OTU166 | Basidiomycota | Tremellomycetes     | Tremellales        | Unidentified        | Unidentified       | Tremellales sp               | 0   | 36 | 0  | 0   | 0  | 0  | 0  |
| OTU167 | Basidiomycota | Cystobasidiomycetes | Erythrobasidiales  | Symmetrosporaceae   | Symmetrospora      | Symmetrospora sp             | 36  | 0  | 11 | 0   | 0  | 0  | 0  |
| OTU168 | Basidiomycota | Pucciniomycetes     | Platyglloeales     | Eocronartiaceae     | Eocronartium       | Eocronartium sp              | 0   | 0  | 0  | 0   | 0  | 0  | 39 |
| OTU169 | Basidiomycota | Pucciniomycetes     | Septobasidiales    | Septobasidiaceae    | Septobasidium      | Septobasidium velutinum      | 0   | 0  | 0  | 0   | 0  | 0  | 31 |
| OTU170 | Basidiomycota | Cystobasidiomycetes | Erythrobasidiales  | Sakaguchiaceae      | Sakaguchia         | Sakaguchia lamellibrachiae   | 0   | 0  | 0  | 33  | 0  | 0  | 0  |
| OTU171 | Basidiomycota | Pucciniomycetes     | Septobasidiales    | Septobasidiaceae    | Septobasidium      | Septobasidium carestianum    | 0   | 0  | 0  | 0   | 0  | 0  | 37 |
| OTU172 | Basidiomycota | Tremellomycetes     | Tremellales        | Trimorphomycetaceae | Saitozyma          | Saitozyma sp                 | 1   | 0  | 25 | 0   | 0  | 0  | 0  |
| OTU173 | Basidiomycota | Cystobasidiomycetes | Erythrobasidiales  | Unidentified        | Unidentified       | Erythrobasidiales sp         | 991 | 0  | 0  | 2   | 1  | 2  | 0  |

|        |               |                     |                    |                    |                  |                                  |    |    |     |    |    |    |    |
|--------|---------------|---------------------|--------------------|--------------------|------------------|----------------------------------|----|----|-----|----|----|----|----|
| OTU174 | Basidiomycota | Pucciniomycetes     | Septobasidiales    | Septobasidiaceae   | Septobasidium    | Septobasidium velutinum          | 0  | 0  | 0   | 0  | 0  | 0  | 33 |
| OTU175 | Basidiomycota | Tremellomycetes     | Tremellales        | Unidentified       | Unidentified     | Tremellales sp                   | 1  | 26 | 0   | 0  | 0  | 0  | 0  |
| OTU176 | Basidiomycota | Pucciniomycetes     | Septobasidiales    | Septobasidiaceae   | Septobasidium    | Septobasidium sp                 | 55 | 0  | 1   | 1  | 0  | 3  | 10 |
| OTU177 | Basidiomycota | Cystobasidiomycetes | Unidentified       | Unidentified       | Unidentified     | Cystobasidiomycetes sp           | 0  | 0  | 2   | 0  | 0  | 1  | 27 |
| OTU178 | Basidiomycota | Pucciniomycetes     | Septobasidiales    | Septobasidiaceae   | Unidentified     | Septobasidiaceae sp              | 0  | 0  | 1   | 0  | 0  | 0  | 31 |
| OTU179 | Basidiomycota | Cystobasidiomycetes | Erythrobasidiales  | Erythrobasidiaceae | Erythrobasidium  | Erythrobasidium sp               | 0  | 0  | 0   | 36 | 0  | 0  | 0  |
| OTU180 | Basidiomycota | Cystobasidiomycetes | Erythrobasidiales  | Erythrobasidiaceae | Erythrobasidium  | Erythrobasidium sp               | 1  | 0  | 65  | 0  | 0  | 0  | 0  |
| OTU181 | Basidiomycota | Tremellomycetes     | Tremellales        | Bulleribasidiaceae | Hannaella        | Hannaella sp                     | 0  | 0  | 0   | 31 | 0  | 0  | 0  |
| OTU182 | Basidiomycota | Agaricomycetes      | Geastrales         | Geastraceae        | Geastrum         | Geastrum triplex                 | 0  | 0  | 0   | 8  | 29 | 0  | 0  |
| OTU183 | Basidiomycota | Tremellomycetes     | Tremellales        | Unidentified       | Unidentified     | Tremellales sp                   | 1  | 18 | 1   | 0  | 0  | 0  | 0  |
| OTU184 | Basidiomycota | Pucciniomycetes     | Septobasidiales    | Septobasidiaceae   | Septobasidium    | Septobasidium velutinum          | 0  | 0  | 0   | 0  | 7  | 0  | 0  |
| OTU185 | Basidiomycota | Microbotryomycetes  | Sporidiobolales    | Sporidiobolaceae   | Rhodosporiobolus | Rhodosporiobolus fluvialis       | 5  | 0  | 0   | 26 | 0  | 0  | 0  |
| OTU186 | Basidiomycota | Cystobasidiomycetes | Erythrobasidiales  | Unidentified       | Unidentified     | Erythrobasidiales sp             | 0  | 0  | 124 | 4  | 0  | 0  | 0  |
| OTU187 | Basidiomycota | Tremellomycetes     | Tremellales        | Bulleribasidiaceae | Hannaella        | Hannaella sp                     | 0  | 0  | 0   | 0  | 17 | 0  | 0  |
| OTU188 | Basidiomycota | Tremellomycetes     | Tremellales        | Tremellaceae       | Cryptococcus     | Cryptococcus sp                  | 2  | 17 | 0   | 0  | 0  | 0  | 0  |
| OTU189 | Basidiomycota | Cystobasidiomycetes | Erythrobasidiales  | Erythrobasidiaceae | Erythrobasidium  | Erythrobasidium hasegawianum     | 0  | 0  | 9   | 0  | 0  | 0  | 0  |
| OTU190 | Basidiomycota | Microbotryomycetes  | Microbotryomycetes | Chryzozymaceae     | Bannozya         | Bannozya sp                      | 0  | 0  | 0   | 12 | 0  | 2  | 0  |
| OTU191 | Basidiomycota | Pucciniomycetes     | Septobasidiales    | Septobasidiaceae   | Septobasidium    | Septobasidium pallidum           | 0  | 1  | 138 | 0  | 0  | 0  | 0  |
| OTU192 | Basidiomycota | Pucciniomycetes     | Septobasidiales    | Septobasidiaceae   | Septobasidium    | Septobasidium sp                 | 2  | 0  | 0   | 0  | 1  | 0  | 0  |
| OTU193 | Basidiomycota | Cystobasidiomycetes | Erythrobasidiales  | Erythrobasidiaceae | Bannoa           | Bannoa sp                        | 0  | 0  | 0   | 0  | 0  | 15 | 0  |
| OTU195 | Basidiomycota | Pucciniomycetes     | Septobasidiales    | Septobasidiaceae   | Septobasidium    | Septobasidium pseudopedicellatum | 1  | 0  | 0   | 0  | 0  | 0  | 24 |
| OTU196 | Basidiomycota | Cystobasidiomycetes | Erythrobasidiales  | Symmetrosporaceae  | Symmetrospora    | Symmetrospora symmetrica         | 0  | 0  | 0   | 0  | 16 | 0  | 0  |
| OTU197 | Basidiomycota | Microbotryomycetes  | Sporidiobolales    | Sporidiobolaceae   | Sporobolomyces   | Sporobolomyces sp                | 12 | 0  | 11  | 0  | 18 | 0  | 0  |
| OTU198 | Basidiomycota | Tremellomycetes     | Tremellales        | Unidentified       | Unidentified     | Tremellales sp                   | 7  | 3  | 13  | 23 | 24 | 2  | 0  |
| OTU199 | Basidiomycota | Cystobasidiomycetes | Erythrobasidiales  | Unidentified       | Unidentified     | Erythrobasidiales sp             | 0  | 0  | 19  | 0  | 0  | 0  | 0  |
| OTU200 | Basidiomycota | Tremellomycetes     | Tremellales        | Unidentified       | Unidentified     | Tremellales sp                   | 0  | 0  | 13  | 0  | 0  | 0  | 0  |
| OTU201 | Basidiomycota | Tremellomycetes     | Tremellales        | Cuniculitremaeae   | Kockovaella      | Kockovaella ogasawarensis        | 0  | 0  | 0   | 18 | 0  | 0  | 0  |
| OTU202 | Basidiomycota | Microbotryomycetes  | Sporidiobolales    | Unidentified       | Unidentified     | Sporidiobolales sp               | 0  | 22 | 0   | 0  | 0  | 0  | 0  |
| OTU203 | Basidiomycota | Microbotryomycetes  | Sporidiobolales    | Sporidiobolaceae   | Sporobolomyces   | Sporobolomyces sp                | 1  | 0  | 0   | 0  | 0  | 0  | 0  |

|        |               |                     |                    |                     |                  |                                 |    |    |      |    |    |    |    |
|--------|---------------|---------------------|--------------------|---------------------|------------------|---------------------------------|----|----|------|----|----|----|----|
| OTU204 | Unidentified  | Unidentified        | Unidentified       | Unidentified        | Unidentified     | Fungi sp                        | 0  | 0  | 1048 | 6  | 0  | 0  | 0  |
| OTU205 | Basidiomycota | Pucciniomycetes     | Septobasidiales    | Septobasidiaceae    | Septobasidium    | Septobasidium velutinum         | 0  | 0  | 15   | 0  | 0  | 0  | 0  |
| OTU206 | Basidiomycota | Cystobasidiomycetes | Cystobasidiales    | Cystobasidiaceae    | Cystobasidium    | Cystobasidium sp                | 4  | 8  | 21   | 0  | 0  | 1  | 1  |
| OTU207 | Basidiomycota | Tremellomycetes     | Tremellales        | Carcinomycetaceae   | Carcinomyces     | Carcinomyces sp                 | 0  | 14 | 0    | 0  | 0  | 0  | 0  |
| OTU209 | Basidiomycota | Microbotryomycetes  | Sporidiobolales    | Sporidiobolaceae    | Sporobolomyces   | Sporobolomyces sp               | 27 | 0  | 0    | 0  | 0  | 0  | 0  |
| OTU210 | Basidiomycota | Cystobasidiomycetes | Cystobasidiales    | Cystobasidiaceae    | Cystobasidium    | Cystobasidium sp                | 5  | 0  | 151  | 7  | 0  | 0  | 0  |
| OTU211 | Basidiomycota | Tremellomycetes     | Tremellales        | Tremellaceae        | Tremella         | Tremella diploschistina         | 9  | 0  | 6    | 2  | 4  | 0  | 0  |
| OTU212 | Basidiomycota | Cystobasidiomycetes | Cystobasidiales    | Cystobasidiaceae    | Cystobasidium    | Cystobasidium sp                | 0  | 0  | 0    | 1  | 23 | 0  | 0  |
| OTU213 | Basidiomycota | Tremellomycetes     | Tremellales        | Cuniculitremaeae    | Kockovaella      | Kockovaella sp                  | 0  | 2  | 3    | 0  | 1  | 0  | 0  |
| OTU214 | Basidiomycota | Microbotryomycetes  | Sporidiobolales    | Sporidiobolaceae    | Rhodotorula      | Rhodotorula sp                  | 7  | 0  | 0    | 9  | 0  | 0  | 0  |
| OTU215 | Basidiomycota | Pucciniomycetes     | Septobasidiales    | Septobasidiaceae    | Septobasidium    | Septobasidium mariani           | 0  | 0  | 0    | 0  | 7  | 0  | 0  |
| OTU216 | Basidiomycota | Pucciniomycetes     | Septobasidiales    | Septobasidiaceae    | Unidentified     | Septobasidiaceae sp             | 0  | 0  | 80   | 1  | 0  | 1  | 0  |
| OTU217 | Ascomycota    | Lecanoromycetes     | Lecanorales        | Cladoniaceae        | Cladonia         | Cladonia sp                     | 0  | 2  | 73   | 1  | 6  | 0  | 0  |
| OTU218 | Basidiomycota | Cystobasidiomycetes | Cystobasidiales    | Cystobasidiaceae    | Cystobasidium    | Cystobasidium sp                | 4  | 0  | 19   | 0  | 0  | 0  | 0  |
| OTU219 | Basidiomycota | Tremellomycetes     | Tremellales        | Cuniculitremaeae    | Kockovaella      | Kockovaella sp                  | 10 | 1  | 1    | 0  |    | 0  | 5  |
| OTU220 | Basidiomycota | Microbotryomycetes  | Sporidiobolales    | Sporidiobolaceae    | Rhodotorula      | Rhodotorula paludigena          | 16 | 0  | 0    | 0  | 0  | 0  | 0  |
| OTU221 | Basidiomycota | Microbotryomycetes  | Microbotryomycetes | Microbotryomycetes  | Curvibasidium    | Curvibasidium pallidicorallinum | 25 | 0  | 1    | 0  | 0  | 0  | 0  |
| OTU222 | Basidiomycota | Cystobasidiomycetes | Naohideales        | Unidentified        | Unidentified     | Naohideales sp                  | 0  | 0  | 0    | 25 | 0  | 0  | 1  |
| OTU223 | Basidiomycota | Microbotryomycetes  | Sporidiobolales    | Unidentified        | Unidentified     | Sporidiobolales sp              | 0  | 0  | 0    | 0  | 10 | 0  | 0  |
| OTU224 | Basidiomycota | Pucciniomycetes     | Septobasidiales    | Septobasidiaceae    | Septobasidium    | Septobasidium velutinum         | 0  | 0  | 8    | 0  | 0  | 0  | 0  |
| OTU225 | Basidiomycota | Microbotryomycetes  | Sporidiobolales    | Sporidiobolaceae    | Sporobolomyces   | Sporobolomyces sp               | 2  | 0  | 4    | 0  | 3  | 0  | 0  |
| OTU226 | Basidiomycota | Tremellomycetes     | Tremellales        | Trimorphomycetaceae | Carlosrosaea     | Carlosrosaea sp                 | 0  | 0  | 5    | 0  | 9  | 0  | 2  |
| OTU227 | Basidiomycota | Tremellomycetes     | Tremellales        | Cuniculitremaeae    | Kockovaella      | Kockovaella mexicana            | 0  | 0  | 10   | 0  | 0  | 0  | 0  |
| OTU228 | Basidiomycota | Microbotryomycetes  | Sporidiobolales    | Sporidiobolaceae    | Rhodotorula      | Rhodotorula paludigena          | 4  | 0  | 0    | 0  | 0  | 0  | 0  |
| OTU229 | Basidiomycota | Pucciniomycetes     | Septobasidiales    | Septobasidiaceae    | Septobasidium    | Septobasidium carestianum       | 0  | 0  | 0    | 0  | 0  | 36 | 0  |
| OTU230 | Basidiomycota | Tremellomycetes     | Tremellales        | Cuniculitremaeae    | Kockovaella      | Kockovaella calophylli          | 1  | 0  | 3    | 0  | 0  | 0  | 0  |
| OTU231 | Basidiomycota | Pucciniomycetes     | Septobasidiales    | Septobasidiaceae    | Unidentified     | Unidentified                    | 0  | 0  | 0    | 0  | 1  | 0  | 3  |
| OTU232 | Basidiomycota | Agaricomycetes      | Hymenochaetales    | Schizoporaceae      | Xylodon          | Xylodon crustosus               | 6  | 1  | 0    | 0  | 0  | 0  | 0  |
| OTU233 | Basidiomycota | Pucciniomycetes     | Septobasidiales    | Septobasidiaceae    | Septobasidium    | Septobasidium sp                | 0  | 0  | 0    | 0  | 0  | 36 | 37 |
| OTU234 | Basidiomycota | Microbotryomycetes  | Microbotryomycetes | Chrysozymaceae      | Oberwinklerozyma | Oberwinklerozyma silvestris     | 1  | 0  | 12   | 0  | 0  | 0  | 0  |

|        |               |                     |                    |                       |                 |                           |     |   |     |    |    |    |   |
|--------|---------------|---------------------|--------------------|-----------------------|-----------------|---------------------------|-----|---|-----|----|----|----|---|
| OTU235 | Basidiomycota | Cystobasidiomycetes | Erythrobasidiales  | Erythrobasidiaceae    | Erythrobasidium | Erythrobasidium sp        | 0   | 0 | 9   | 0  | 0  | 0  | 0 |
| OTU236 | Basidiomycota | Cystobasidiomycetes | Erythrobasidiales  | Erythrobasidiaceae    | Erythrobasidium | Erythrobasidium sp        | 0   | 0 | 0   | 3  | 0  | 0  | 0 |
| OTU237 | Basidiomycota | Tremellomycetes     | Tremellales        | Cuniculitremaeae      | Kockovaella     | Kockovaella sp            | 0   | 0 | 6   | 0  | 0  | 0  | 0 |
| OTU238 | Basidiomycota | Tremellomycetes     | Tremellales        | Cuniculitremaeae      | Kockovaella     | Kockovaella prillingeri   | 0   | 0 | 7   | 3  | 0  | 0  | 0 |
| OTU239 | Basidiomycota | Pucciniomycetes     | Septobasidiales    | Septobasidiaceae      | Unidentified    | Septobasidiaceae sp       | 0   | 0 | 6   | 0  | 0  | 0  | 0 |
| OTU240 | Basidiomycota | Tremellomycetes     | Tremellales        | Cuniculitremaeae      | Kockovaella     | Kockovaella sp            | 0   | 0 | 2   | 2  | 0  | 0  | 0 |
| OTU241 | Basidiomycota | Pucciniomycetes     | Septobasidiales    | Septobasidiaceae      | Unidentified    | Septobasidiaceae sp       | 0   | 0 | 8   | 0  | 0  | 0  | 0 |
| OTU242 | Basidiomycota | Pucciniomycetes     | Septobasidiales    | Septobasidiaceae      | Septobasidium   | Septobasidium carestianum | 1   | 0 | 11  | 0  | 0  | 0  | 0 |
| OTU243 | Basidiomycota | Microbotryomycetes  | Microbotryomycetes | Chysozymaceae         | Spencerozyma    | Spencerozyma sp           | 22  | 0 | 0   | 0  | 0  | 0  | 0 |
| OTU244 | Basidiomycota | Tremellomycetes     | Tremellales        | Rhynchogastremataceae | Papiliotrema    | Papiliotrema aurea        | 8   | 0 | 1   | 0  | 1  | 0  | 0 |
| OTU245 | Basidiomycota | Cystobasidiomycetes | Erythrobasidiales  | Unidentified          | Unidentified    | Erythrobasidiales sp      | 0   | 0 | 0   | 0  | 5  | 0  | 0 |
| OTU246 | Basidiomycota | Microbotryomycetes  | Microbotryomycetes | Heterogastridiaceae   | Colacogloea     | Colacogloea cycloclastica | 0   | 0 | 5   | 2  | 0  | 0  | 0 |
| OTU247 | Basidiomycota | Agaricomycetes      | Agaricales         | Inocybaceae           | Inocybe         | Inocybe sp                | 0   | 0 | 1   | 0  | 0  | 0  | 0 |
| OTU248 | Basidiomycota | Pucciniomycetes     | Septobasidiales    | Septobasidiaceae      | Unidentified    | Septobasidiaceae sp       | 0   | 0 | 43  | 0  | 0  | 1  | 0 |
| OTU249 | Basidiomycota | Cystobasidiomycetes | Erythrobasidiales  | Unidentified          | Unidentified    | Cystobasidiales sp        | 354 | 0 | 1   | 0  | 0  | 0  | 1 |
| OTU250 | Basidiomycota | Cystobasidiomycetes | Erythrobasidiales  | Symmetrosporaceae     | Symmetrospora   | Symmetrospora sp          | 0   | 0 | 4   | 0  | 2  | 0  | 0 |
| OTU251 | Basidiomycota | Pucciniomycetes     | Septobasidiales    | Septobasidiaceae      | Unidentified    | Septobasidiaceae sp       | 0   | 0 | 291 | 0  | 0  | 0  | 0 |
| OTU252 | Basidiomycota | Pucciniomycetes     | Septobasidiales    | Septobasidiaceae      | Septobasidium   | Septobasidium carestianum | 0   | 0 | 0   | 0  | 0  | 5  | 1 |
| OTU253 | Basidiomycota | Pucciniomycetes     | Septobasidiales    | Septobasidiaceae      | Septobasidium   | Septobasidium velutinum   | 0   | 0 | 876 | 0  | 0  | 0  | 0 |
| OTU254 | Basidiomycota | Pucciniomycetes     | Septobasidiales    | Septobasidiaceae      | Septobasidium   | Septobasidium sinuosum    | 0   | 0 | 58  | 0  | 0  | 0  | 0 |
| OTU255 | Basidiomycota | Atractiellomycetes  | Atractiellales     | Helicogloeaceae       | Helicogloea     | Helicogloea dryina        | 0   | 0 | 0   | 12 | 0  | 0  | 0 |
| OTU256 | Basidiomycota | Tremellomycetes     | Tremellales        | Bulleraceae           | Genolevuria     | Genolevuria sp            | 0   | 0 | 1   | 0  | 0  | 0  | 6 |
| OTU257 | Basidiomycota | Pucciniomycetes     | Septobasidiales    | Septobasidiaceae      | Unidentified    | Unidentified              | 3   | 1 | 11  | 3  | 2  | 0  | 0 |
| OTU258 | Ascomycota    | Lecanoromycetes     | Lecanorales        | Cladoniaceae          | Cladonia        | Cladonia sp               | 0   | 0 | 9   | 0  | 4  | 0  | 0 |
| OTU259 | Basidiomycota | Cystobasidiomycetes | Naohideales        | Unidentified          | Unidentified    | Naohideales sp            | 0   | 0 | 0   | 4  | 0  | 0  | 1 |
| OTU260 | Ascomycota    | Lecanoromycetes     | Lecanorales        | Cladoniaceae          | Cladonia        | Cladonia rei              | 15  | 1 | 0   | 4  | 35 | 13 | 1 |
| OTU261 | Unidentified  | Unidentified        | Unidentified       | Unidentified          | Unidentified    | Fungi sp                  | 0   | 0 | 1   | 0  | 0  | 0  | 0 |
| OTU262 | Unidentified  | Unidentified        | Unidentified       | Unidentified          | Unidentified    | Fungi sp                  | 1   | 3 | 0   | 14 | 0  | 0  | 0 |
| OTU263 | Basidiomycota | Tremellomycetes     | Tremellales        | Cuniculitremaeae      | Kockovaella     | Kockovaella sp            | 1   | 0 | 0   | 0  | 2  | 8  | 1 |
| OTU264 | Ascomycota    | Lecanoromycetes     | Lecanorales        | Cladoniaceae          | Cladonia        | Cladonia rei              | 0   | 1 | 0   | 0  | 14 | 7  | 0 |

|        |               |                     |                    |                     |                  |                                 |    |   |     |    |   |    |   |
|--------|---------------|---------------------|--------------------|---------------------|------------------|---------------------------------|----|---|-----|----|---|----|---|
| OTU265 | Basidiomycota | Pucciniomycetes     | Septobasidiales    | Septobasidiaceae    | Septobasidium    | Septobasidium carestianum       | 0  | 0 | 0   | 0  | 0 | 6  | 0 |
| OTU266 | Basidiomycota | Tremellomycetes     | Tremellales        | Trimorphomycetaceae | Saitozyma        | Saitozyma sp                    | 1  | 0 | 0   | 0  | 0 | 0  | 0 |
| OTU267 | Basidiomycota | Tremellomycetes     | Tremellales        | Unidentified        | Unidentified     | Tremellales sp                  | 0  | 0 | 2   | 0  | 0 | 0  | 0 |
| OTU268 | Basidiomycota | Agaricomycetes      | Russulales         | Lachnocladiaceae    | Vararia          | Vararia minidichophysa          | 0  | 0 | 0   | 5  | 0 | 0  | 0 |
| OTU269 | Basidiomycota | Cystobasidiomycetes | Erythrobasidiales  | Erythrobasidiaceae  | Erythrobasidium  | Erythrobasidium sp              | 9  | 1 | 0   | 0  | 1 | 0  | 1 |
| OTU270 | Basidiomycota | Pucciniomycetes     | Septobasidiales    | Septobasidiaceae    | Septobasidium    | Septobasidium mariani           | 0  | 0 | 7   | 0  | 0 | 0  | 0 |
| OTU271 | Basidiomycota | Urediniomycetes     | Urediniomycetes    | Urediniomycetes     | Curvibasidium    | Curvibasidium pallidicorallinum | 7  | 0 | 0   | 0  | 0 | 0  | 0 |
| OTU272 | Basidiomycota | Tremellomycetes     | Tremellales        | Bulleribasidiaceae  | Hannaella        | Hannaella sp                    | 0  | 5 | 0   | 0  | 0 | 0  | 0 |
| OTU273 | Basidiomycota | Tremellomycetes     | Tremellales        | Cuniculitremaeae    | Kockovaella      | Kockovaella chinensis           | 0  | 0 | 3   | 0  | 0 | 0  | 0 |
| OTU274 | Unidentified  | Unidentified        | Unidentified       | Unidentified        | Unidentified     | Fungi sp                        | 0  | 0 | 3   | 0  | 0 | 0  | 0 |
| OTU275 | Basidiomycota | Cystobasidiomycetes | Erythrobasidiales  | Unidentified        | Unidentified     | Erythrobasidiales sp            | 1  | 0 | 76  | 1  | 0 | 18 | 0 |
| OTU276 | Basidiomycota | Microbotryomycetes  | Sporidiobolales    | Sporidiobolaceae    | Rhodotorula      | Rhodotorula sp                  | 34 | 0 | 0   | 0  | 0 | 0  | 3 |
| OTU277 | Basidiomycota | Agaricomycetes      | Geastrales         | Geastraceae         | Geastrum         | Geastrum triplex                | 0  | 0 | 0   | 1  | 3 | 0  | 0 |
| OTU278 | Basidiomycota | Microbotryomycetes  | Sporidiobolales    | Sporidiobolaceae    | Sporobolomyces   | Sporobolomyces sp               | 2  | 0 | 0   | 0  | 3 | 0  | 0 |
| OTU279 | Basidiomycota | Tremellomycetes     | Tremellales        | Tremellaceae        | Tremella         | Tremella diploschistina         | 2  | 6 | 11  | 13 | 6 | 1  | 0 |
| OTU280 | Basidiomycota | Microbotryomycetes  | Microbotryomycetes | Heterogastridiaceae | Colacogloea      | Colacogloea eucalyptica         | 0  | 0 | 6   | 0  | 0 | 0  | 0 |
| OTU281 | Basidiomycota | Agaricomycetes      | Agaricales         | Marasmiaceae        | Marasmius        | Marasmius sp                    | 0  | 0 | 0   | 1  | 0 | 0  | 0 |
| OTU282 | Ascomycota    | Lecanoromycetes     | Lecanorales        | Cladoniaceae        | Cladonia         | Cladonia rei                    | 2  | 3 | 0   | 10 | 9 | 5  | 7 |
| OTU283 | Basidiomycota | Cystobasidiomycetes | Unidentified       | Unidentified        | Unidentified     | Cystobasidiomycetes sp          | 0  | 0 | 0   | 0  | 0 | 0  | 4 |
| OTU284 | Basidiomycota | Tremellomycetes     | Tremellales        | Cuniculitremaeae    | Kockovaella      | Kockovaella sp                  | 0  | 0 | 2   | 9  | 0 | 0  | 0 |
| OTU285 | Basidiomycota | Tremellomycetes     | Tremellales        | Cuniculitremaeae    | Kockovaella      | Kockovaella litseae             | 0  | 0 | 4   | 0  | 0 | 0  | 0 |
| OTU286 | Unidentified  | Unidentified        | Unidentified       | Unidentified        | Unidentified     | Unidentified                    | 1  | 0 | 0   | 8  | 0 | 0  | 0 |
| OTU287 | Basidiomycota | Pucciniomycetes     | Septobasidiales    | Septobasidiaceae    | Septobasidium    | Septobasidium sp                | 0  | 0 | 690 | 0  | 0 | 0  | 0 |
| OTU288 | Basidiomycota | Tremellomycetes     | Tremellales        | Cuniculitremaeae    | Kockovaella      | Kockovaella chinensis           | 0  | 0 | 6   | 0  | 0 | 0  | 0 |
| OTU289 | Unidentified  | Unidentified        | Unidentified       | Unidentified        | Unidentified     | Fungi sp                        | 0  | 0 | 0   | 10 | 0 | 0  | 0 |
| OTU290 | Basidiomycota | Tremellomycetes     | Tremellales        | Unidentified        | Unidentified     | Tremellales sp                  | 0  | 0 | 0   | 0  | 6 | 0  | 0 |
| OTU291 | Basidiomycota | Cystobasidiomycetes | Unidentified       | Unidentified        | Unidentified     | Unidentified                    | 1  | 3 | 1   | 0  | 0 | 0  | 0 |
| OTU292 | Basidiomycota | Microbotryomycetes  | Microbotryomycetes | Chrysozymaceae      | Oberwinklerozyma | Oberwinklerozyma silvestris     | 0  | 0 | 9   | 0  | 0 | 0  | 0 |
| OTU293 | Unidentified  | Unidentified        | Unidentified       | Unidentified        | Unidentified     | Fungi sp                        | 0  | 0 | 16  | 0  | 0 | 0  | 0 |
| OTU294 | Basidiomycota | Cystobasidiomycetes | Erythrobasidiales  | Erythrobasidiaceae  | Erythrobasidium  | Erythrobasidium sp              | 2  | 0 | 0   | 0  | 0 | 0  | 0 |
| OTU295 | Basidiomycota | Tremellomycetes     | Tremellales        | Unidentified        | Unidentified     | Tremellales sp                  | 0  | 0 | 5   | 0  | 1 | 0  | 0 |

|        |               |                     |                   |                      |               |                            |    |    |    |     |    |     |    |
|--------|---------------|---------------------|-------------------|----------------------|---------------|----------------------------|----|----|----|-----|----|-----|----|
| OTU296 | Basidiomycota | Cystobasidiomycetes | Erythrobasidiales | Microsporomycetaceae | Unidentified  | Microsporomycetaceae sp    | 2  | 0  | 0  | 0   | 0  | 0   | 0  |
| OTU297 | Ascomycota    | Lecanoromycetes     | Lecanorales       | Cladoniaceae         | Cladonia      | Cladonia sp                | 0  | 21 | 66 | 5   | 18 | 1   | 0  |
| OTU298 | Ascomycota    | Lecanoromycetes     | Lecanorales       | Cladoniaceae         | Cladonia      | Cladonia rei               | 49 | 6  | 0  | 20  | 33 | 0   | 12 |
| OTU299 | Basidiomycota | Tremellomycetes     | Tremellales       | Cuniculitremaeae     | Kockovaella   | Kockovaella sp             | 0  | 0  | 0  | 3   | 0  | 0   | 0  |
| OTU300 | Basidiomycota | Agaricomycetes      | Hymenochaetales   | Schizoporaceae       | Hyphodontia   | Hyphodontia sp             | 0  | 0  | 0  | 0   | 0  | 0   | 2  |
| OTU301 | Basidiomycota | Cystobasidiomycetes | Cystobasidiales   | Cystobasidiaceae     | Occultifur    | Occultifur mephitis        | 15 | 0  | 0  | 0   | 0  | 0   | 0  |
| OTU302 | Basidiomycota | Cystobasidiomycetes | Erythrobasidiales | Unidentified         | Unidentified  | Erythrobasidiales sp       | 4  | 0  | 0  | 0   | 0  | 0   | 0  |
| OTU303 | Ascomycota    | Lecanoromycetes     | Lecanorales       | Cladoniaceae         | Cladonia      | Cladonia rei               | 0  | 0  | 0  | 0   | 0  | 110 | 2  |
| OTU304 | Basidiomycota | Pucciniomycetes     | Septobasidiales   | Septobasidiaceae     | Septobasidium | Septobasidium carestianum  | 0  | 0  | 0  | 0   | 0  | 3   | 0  |
| OTU305 | Basidiomycota | Tremellomycetes     | Tremellales       | Bulleribasidiaceae   | Hannaella     | Hannaella sp               | 0  | 0  | 0  | 2   | 0  | 0   | 0  |
| OTU306 | Basidiomycota | Pucciniomycetes     | Septobasidiales   | Septobasidiaceae     | Septobasidium | Septobasidium carestianum  | 0  | 0  | 1  | 3   | 0  | 11  | 0  |
| OTU307 | Basidiomycota | Pucciniomycetes     | Septobasidiales   | Septobasidiaceae     | Septobasidium | Septobasidium sp           | 0  | 0  | 0  | 0   | 0  | 9   | 0  |
| OTU308 | Ascomycota    | Lecanoromycetes     | Lecanorales       | Cladoniaceae         | Cladonia      | Cladonia rei               | 13 | 6  | 20 | 0   | 4  | 0   | 0  |
| OTU309 | Unidentified  | Unidentified        | Unidentified      | Unidentified         | Unidentified  | Unidentified               | 2  | 1  | 2  | 0   | 0  | 11  | 0  |
| OTU310 | Basidiomycota | Cystobasidiomycetes | Erythrobasidiales | Erythrobasidiaceae   | Bannoa        | Bannoa ogasawarensis       | 0  | 0  | 0  | 102 | 0  | 0   | 0  |
| OTU311 | Basidiomycota | Microbotryomycetes  | Sporidiobolales   | Sporidiobolaceae     | Rhodotorula   | Rhodotorula mucilaginososa | 0  | 2  | 0  | 0   | 1  | 0   | 0  |
| OTU312 | Basidiomycota | Cystobasidiomycetes | Cystobasidiales   | Cystobasidiaceae     | Cystobasidium | Cystobasidium sp           | 0  | 0  | 0  | 0   | 0  | 14  | 0  |
| OTU313 | Ascomycota    | Lecanoromycetes     | Lecanorales       | Cladoniaceae         | Cladonia      | Cladonia sp                | 0  | 3  | 1  | 29  | 4  | 0   | 8  |
| OTU314 | Basidiomycota | Pucciniomycetes     | Septobasidiales   | Septobasidiaceae     | Septobasidium | Septobasidium pallidum     | 0  | 0  | 0  | 0   | 0  | 6   | 0  |
| OTU315 | Basidiomycota | Pucciniomycetes     | Septobasidiales   | Septobasidiaceae     | Septobasidium | Septobasidium carestianum  | 0  | 0  | 0  | 0   | 0  | 11  | 0  |
| OTU316 | Basidiomycota | Tremellomycetes     | Tremellales       | Trimorphomycetaceae  | Carlosrosaea  | Carlosrosaea sp            | 0  | 0  | 3  | 0   | 0  | 0   | 0  |
| OTU317 | Basidiomycota | Pucciniomycetes     | Septobasidiales   | Septobasidiaceae     | Unidentified  | Septobasidiaceae sp        | 0  | 0  | 5  | 0   | 0  | 0   | 0  |
| OTU318 | Basidiomycota | Pucciniomycetes     | Septobasidiales   | Septobasidiaceae     | Septobasidium | Septobasidium mariani      | 0  | 0  | 3  | 0   | 0  | 0   | 0  |
| OTU319 | Basidiomycota | Pucciniomycetes     | Septobasidiales   | Septobasidiaceae     | Septobasidium | Septobasidium carestianum  | 0  | 0  | 0  | 0   | 0  | 2   | 0  |
| OTU320 | Basidiomycota | Agaricomycetes      | Russulales        | Wrightoporiaceae     | Wrightoporia  | Wrightoporia sp            | 0  | 0  | 4  | 0   | 0  | 0   | 0  |
| OTU321 | Basidiomycota | Cystobasidiomycetes | Cystobasidiales   | Cystobasidiaceae     | Cystobasidium | Cystobasidium sp           | 0  | 0  | 23 | 1   | 0  | 0   | 0  |
| OTU322 | Basidiomycota | Cystobasidiomycetes | Cystobasidiales   | Cystobasidiaceae     | Occultifur    | Occultifur mephitis        | 6  | 0  | 0  | 0   | 0  | 0   | 0  |
| OTU323 | Basidiomycota | Unidentified        | Unidentified      | Unidentified         | Unidentified  | GS27 sp                    | 0  | 0  | 6  | 1   | 0  | 0   | 0  |
| OTU324 | Basidiomycota | Agaricomycetes      | Corticiales       | Corticaceae          | Corticium     | Corticium sp               | 0  | 0  | 2  | 0   | 0  | 0   | 0  |
| OTU325 | Basidiomycota | Agaricomycetes      | Agaricales        | Lycoperdaceae        | Lycoperdon    | Lycoperdon perlatum        | 0  | 0  | 0  | 0   | 2  | 1   | 0  |

|        |               |                     |                    |                     |                 |                           |    |    |    |   |    |    |   |
|--------|---------------|---------------------|--------------------|---------------------|-----------------|---------------------------|----|----|----|---|----|----|---|
| OTU326 | Basidiomycota | Tremellomycetes     | Tremellales        | Bulleribasidiaceae  | Hannaella       | Hannaella kunmingensis    | 0  | 0  | 0  | 0 | 2  | 5  | 0 |
| OTU327 | Basidiomycota | Cystobasidiomycetes | Erythrobasidiales  | Erythrobasidiaceae  | Erythrobasidium | Erythrobasidium sp        | 3  | 0  | 0  | 0 | 0  | 0  | 0 |
| OTU328 | Basidiomycota | Pucciniomycetes     | Septobasidiales    | Septobasidiaceae    | Septobasidium   | Septobasidium carestianum | 0  | 0  | 0  | 0 | 0  | 5  | 0 |
| OTU329 | Basidiomycota | Microbotryomycetes  | Microbotryomycetes | Heterogastridiaceae | Colacogloea     | Colacogloea sp            | 19 | 0  | 0  | 0 | 0  | 0  | 2 |
| OTU330 | Basidiomycota | Agaricomycetes      | Boletales          | Suillaceae          | Suillus         | Suillus sp                | 0  | 14 | 0  | 0 | 0  | 0  | 0 |
| OTU331 | Basidiomycota | Tremellomycetes     | Tremellales        | Unidentified        | Unidentified    | Tremellales sp            | 3  | 0  | 0  | 0 | 0  | 0  | 0 |
| OTU332 | Basidiomycota | Pucciniomycetes     | Septobasidiales    | Septobasidiaceae    | Unidentified    | Septobasidiaceae sp       | 0  | 0  | 17 | 0 | 0  | 1  | 0 |
| OTU333 | Ascomycota    | Lecanoromycetes     | Lecanorales        | Cladoniaceae        | Cladonia        | Cladonia sp               | 0  | 0  | 20 | 0 | 0  | 0  | 0 |
| OTU334 | Basidiomycota | Agaricomycetes      | Hymenochaetales    | Schizoporaceae      | Hyphodontia     | Hyphodontia rhizomorpha   | 0  | 0  | 0  | 0 | 0  | 2  | 0 |
| OTU335 | Unidentified  | Unidentified        | Unidentified       | Unidentified        | Unidentified    | Unidentified              | 1  | 2  | 0  | 0 | 0  | 0  | 6 |
| OTU336 | Unidentified  | Unidentified        | Unidentified       | Unidentified        | Unidentified    | Fungi sp                  | 9  | 0  | 0  | 0 | 0  | 0  | 0 |
| OTU337 | Basidiomycota | Cystobasidiomycetes | Erythrobasidiales  | Unidentified        | Unidentified    | Unidentified              | 0  | 0  | 3  | 0 | 4  | 0  |   |
| OTU338 | Basidiomycota | Cystobasidiomycetes | Erythrobasidiales  | Erythrobasidiaceae  | Bannoa          | Bannoa ogasawarensis      | 16 | 0  | 0  | 2 | 14 | 0  | 0 |
| OTU339 | Unidentified  | Unidentified        | Unidentified       | Unidentified        | Unidentified    | Unidentified              | 0  | 0  | 0  | 0 | 0  | 22 | 0 |
| OTU340 | Basidiomycota | Cystobasidiomycetes | Cystobasidiales    | Cystobasidiaceae    | Occultifur      | Occultifur mephitis       | 3  | 0  | 0  | 0 | 0  | 0  | 0 |
| OTU341 | Basidiomycota | Cystobasidiomycetes | Cystobasidiales    | Cystobasidiaceae    | Occultifur      | Occultifur sp             | 1  | 0  | 0  | 0 | 0  | 0  | 0 |
| OTU342 | Basidiomycota | Cystobasidiomycetes | Cystobasidiales    | Cystobasidiaceae    | Cystobasidium   | Cystobasidium sp          | 0  | 0  | 1  | 4 | 0  | 0  | 1 |
| OTU343 | Basidiomycota | Cystobasidiomycetes | Cystobasidiales    | Cystobasidiaceae    | Cystobasidium   | Cystobasidium sp          | 3  | 0  | 0  | 0 | 0  | 0  | 0 |
| OTU344 | Basidiomycota | Agaricomycetes      | Amylocorticiales   | Amylocorticiaceae   | Amyloathelia    | Amyloathelia crassiuscula | 0  | 0  | 2  | 0 | 0  | 2  | 0 |
| OTU345 | Basidiomycota | Microbotryomycetes  | Microbotryomycetes | Chrysozymaceae      | Bannozya        | Bannozya yamatoana        | 0  | 0  | 1  | 1 | 0  | 41 | 0 |
| OTU346 | Ascomycota    | Lecanoromycetes     | Lecanorales        | Cladoniaceae        | Cladonia        | Cladonia rei              | 0  | 0  | 2  | 1 | 2  | 4  | 0 |
| OTU347 | Basidiomycota | Microbotryomycetes  | Microbotryomycetes | Heterogastridiaceae | Colacogloea     | Colacogloea sp            | 0  | 0  | 0  | 1 | 4  | 0  | 0 |
| OTU348 | Basidiomycota | Cystobasidiomycetes | Erythrobasidiales  | Unidentified        | Unidentified    | Erythrobasidiales sp      | 0  | 0  | 7  | 0 | 0  | 0  | 0 |

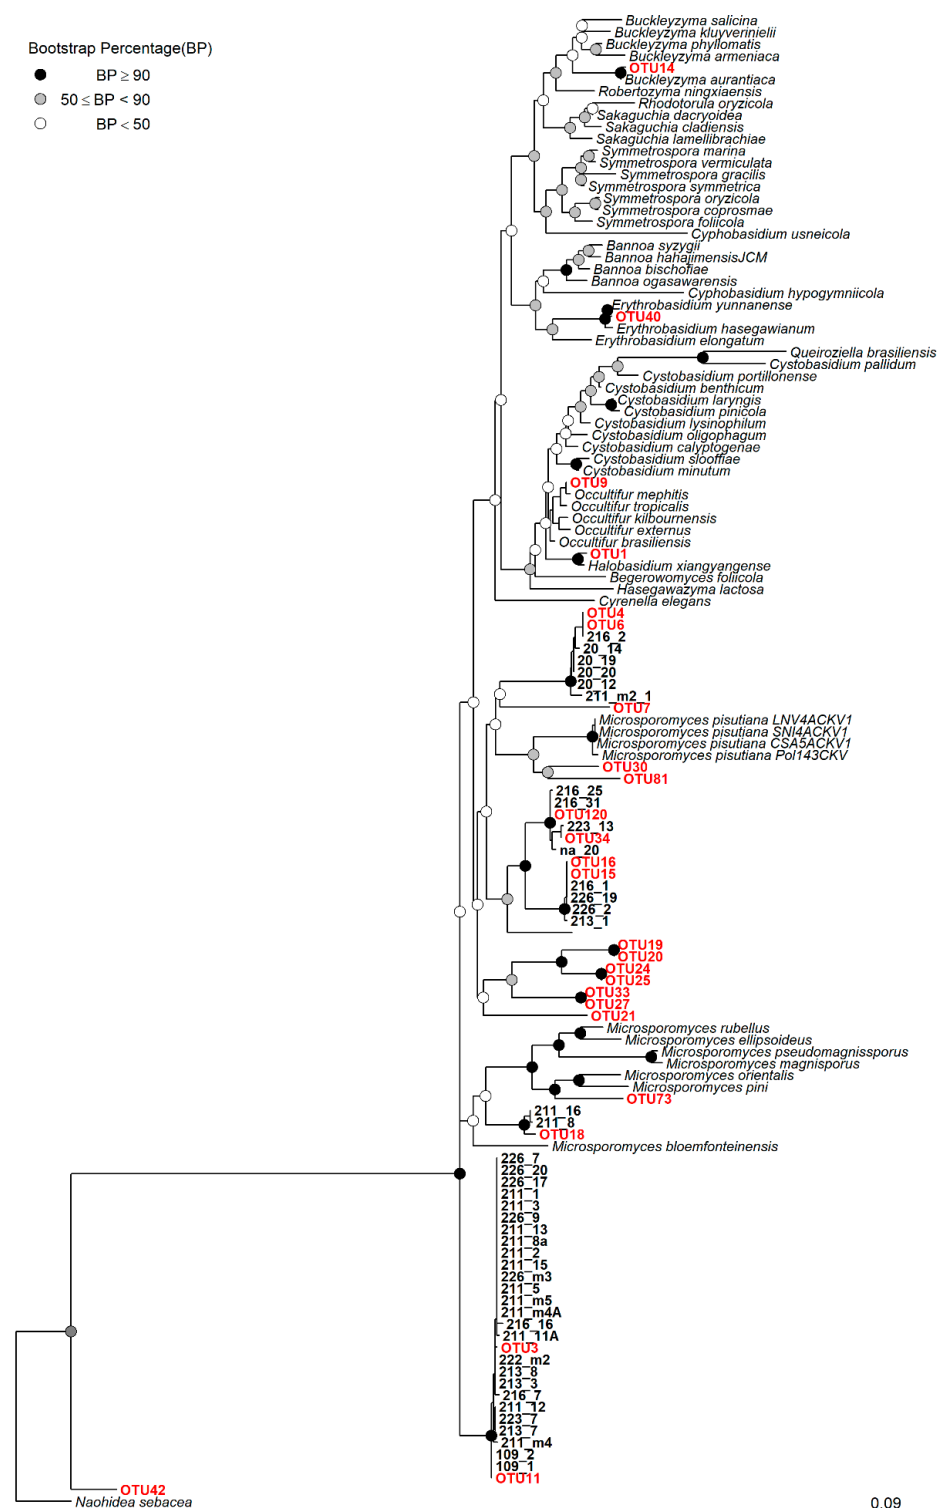

Figure S1. Phylogeny tree of *Cystobasidiomycetes* obtained via the maximum likelihood analysis of the ITS sequences. The OTUs from the meta-barcoding sequences were marked with red color.



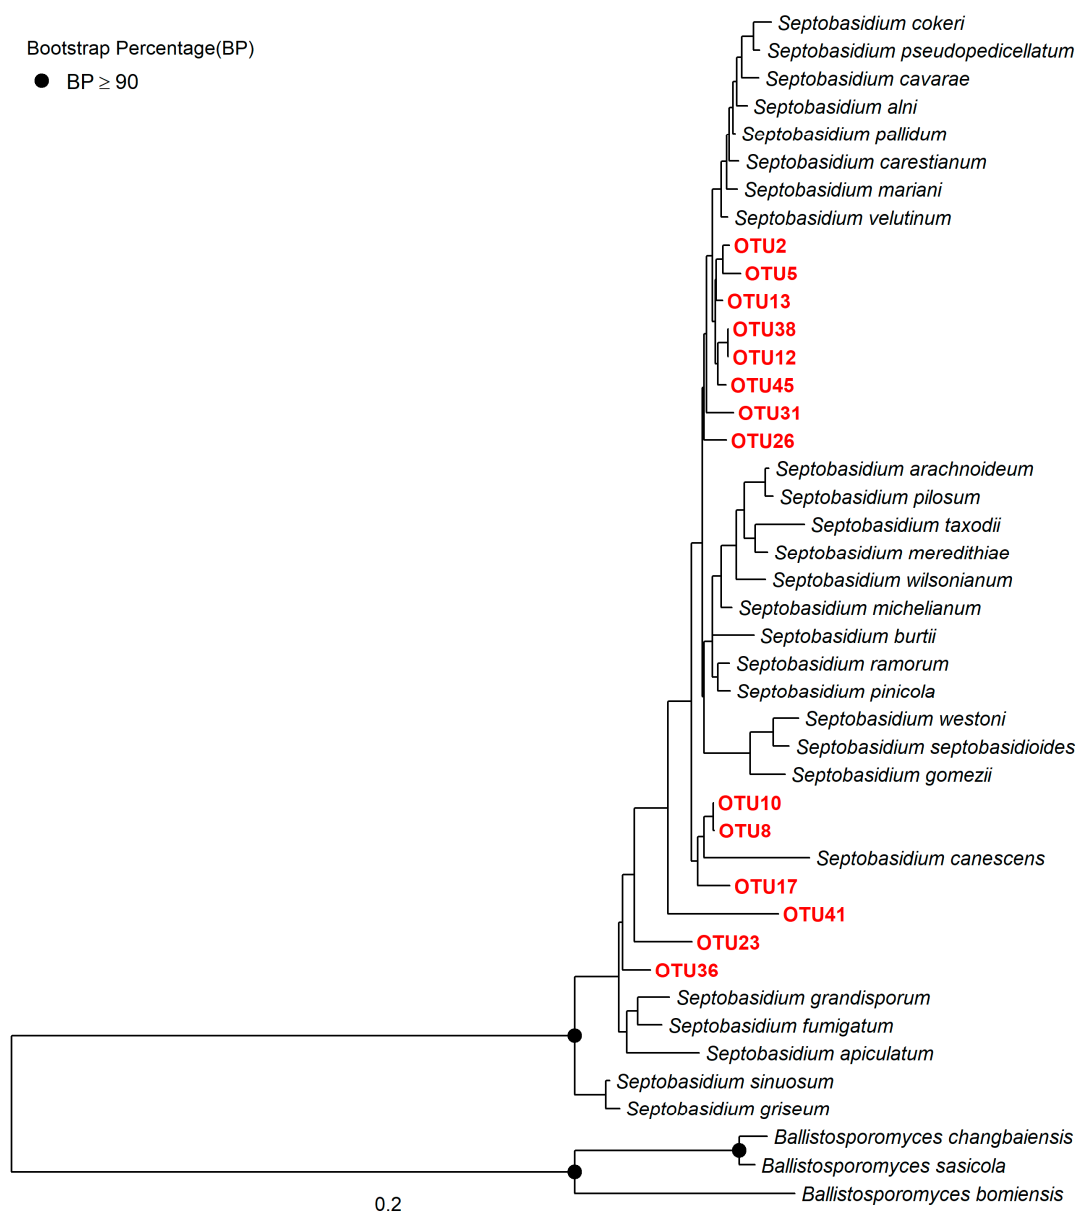

Figure S2. Phylogeny tree of *Septobasidium* obtained by maximum likelihood analysis of the ITS sequences. The OTUs from the meta-barcoding sequences were marked with red color.
